# Supplementary material for: Succession of Ephemeral Secondary Forests and Their Limited Role for the Conservation of Floristic Diversity in a Human-Modified Tropical Landscape
Source: PLOS journal article supplement (doi:10.1371/journal.pone.0082433), 2013-12-11

## Figure S5 | Changes in rarefied species richness during succession

Rarefied species richness as a function of successional stand development, for 4 different plant groups. **a-d)** Plot-level species richness was rarefied to the average number of species per 12 individuals, which was the lowest number of individuals among all plant group  $\times$  plot combinations. Error bars were too small to show. **e)** On landscape scale, species richness was rarefied to the average number of species per 1400 individuals, which was the lowest number of stems among all plant group  $\times$  SBA class combination. Error bars indicate the 95% confidence interval. Colors indicate plant groups as in Fig. S5a-d. Rarefaction was performed using the function 'rarefy' of the R package 'vegan'.

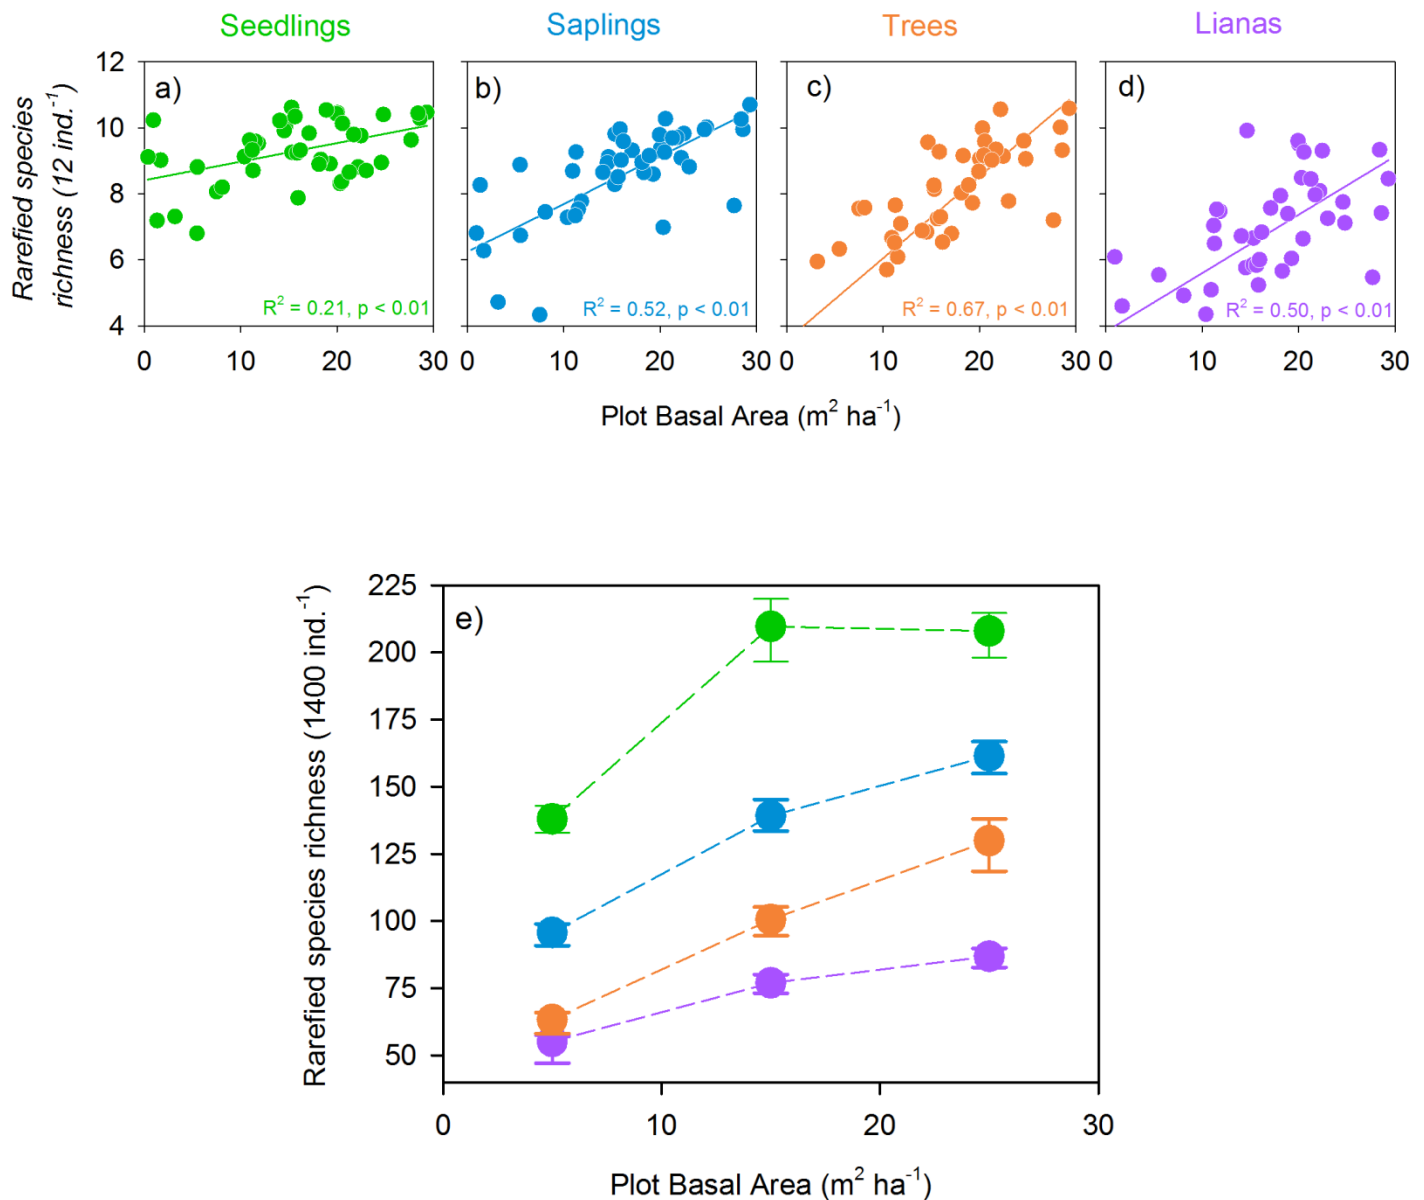

Supplement: S5 (10.1371/journal.pone.0082433.s005) [file journal.pone.0082433.s005]
